# Supplementary material for: The statistical emulators of GGCMI phase 2: responses of year-to-year variation of crop yield to CO 2 , temperature, water, and nitrogen perturbations
Source: Copernicus journal article supplement (doi:10.5194/gmd-16-7203-2023), 2023-12-12
Supplement: Supplementary file 1 [file gmd-16-7203-2023-supplement.pdf]

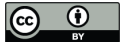

*Supplement of*

**The statistical emulators of GGCM phase 2: responses of year-to-year variation of crop yield to CO<sub>2</sub>, temperature, water, and nitrogen perturbations**

**Weihang Liu et al.**

*Correspondence to:* Tao Ye (yetao@bnu.edu.cn)

The copyright of individual parts of the supplement might differ from the article licence.

## Supplementary materials

**Table S1** The global median R across all grids and perturbations over current croplands.

| GGCM          | Winter wheat |      |      |      | Spring wheat |      |      |      | Maize |      |      |      | Rice |      |      |      |
|---------------|--------------|------|------|------|--------------|------|------|------|-------|------|------|------|------|------|------|------|
|               | C            | T    | W    | N    | C            | T    | W    | N    | C     | T    | W    | N    | C    | T    | W    | N    |
| APSIM-UGOE    | 0.93         | 0.92 | 0.93 | 0.89 | 0.91         | 0.92 | 0.93 | 0.88 | 0.96  | 0.95 | 0.96 | 0.94 | 0.97 | 0.97 | 0.97 | 0.96 |
| CARAIB        | 0.95         | 0.95 | 0.96 | -    | 0.92         | 0.97 | 0.96 | -    | 0.93  | 0.92 | 0.92 | -    | 0.92 | 0.94 | 0.91 | -    |
| EPIC-IIASA    | 0.96         | 0.96 | 0.96 | 0.98 | 0.92         | 0.96 | 0.97 | 0.98 | 0.97  | 0.96 | 0.97 | 0.96 | 0.97 | 0.97 | 0.97 | 0.95 |
| EPIC-TAMU     | 0.95         | 0.95 | 0.95 | 0.93 | 0.87         | 0.91 | 0.94 | 0.89 | 0.95  | 0.84 | 0.96 | 0.93 | 0.93 | 0.92 | 0.94 | 0.87 |
| GEPIC         | 0.93         | 0.93 | 0.91 | 0.9  | 0.87         | 0.88 | 0.93 | 0.86 | 0.96  | 0.89 | 0.95 | 0.91 | 0.95 | 0.9  | 0.95 | 0.88 |
| LPJ-GUESS     | 0.96         | 0.95 | 0.96 | 0.93 | 0.82         | 0.92 | 0.95 | 0.88 | -     | -    | -    | -    | -    | -    | -    | -    |
| LPJmL         | 0.97         | 0.96 | 0.96 | 0.96 | 0.87         | 0.95 | 0.97 | 0.87 | 0.91  | 0.92 | 0.94 | 0.93 | 0.92 | 0.92 | 0.95 | 0.93 |
| ORCHIDEE-crop | 0.97         | 0.97 | 0.97 | 0.97 | -            | -    | -    | -    | 0.89  | 0.89 | 0.89 | 0.89 | 0.92 | 0.92 | 0.92 | 0.92 |
| pDSSAT        | 0.96         | 0.95 | 0.95 | 0.95 | 0.77         | 0.88 | 0.92 | 0.83 | 0.90  | 0.85 | 0.89 | 0.88 | 0.88 | 0.89 | 0.93 | 0.85 |
| PEPIC         | 0.95         | 0.94 | 0.95 | 0.94 | 0.87         | 0.9  | 0.95 | 0.94 | 0.93  | 0.90 | 0.95 | 0.93 | 0.92 | 0.91 | 0.94 | 0.93 |

\* “-” denotes the lack of raw GGCM simulation

**Table S2** The global median MAE (t/ha) across all grids and all perturbations over current croplands.

| GGCM          | Winter wheat |      |      |      | Spring wheat |      |      |      | Maize |      |      |      | Rice |      |      |      |
|---------------|--------------|------|------|------|--------------|------|------|------|-------|------|------|------|------|------|------|------|
|               | C            | T    | W    | N    | C            | T    | W    | N    | C     | T    | W    | N    | C    | T    | W    | N    |
| APSIM-UGOE    | 0.24         | 0.26 | 0.24 | 0.2  | 0.20         | 0.21 | 0.21 | 0.19 | 0.24  | 0.25 | 0.24 | 0.25 | 0.14 | 0.12 | 0.11 | 0.14 |
| CARAIB        | 1.06         | 0.2  | 0.22 | -    | 0.15         | 0.1  | 0.17 | -    | 1.59  | 0.14 | 0.17 | -    | 1.14 | 0.16 | 0.23 | -    |
| EPIC-IIASA    | 0.17         | 0.16 | 0.16 | 0.16 | 0.15         | 0.09 | 0.09 | 0.10 | 0.15  | 0.15 | 0.15 | 0.20 | 0.12 | 0.1  | 0.11 | 0.18 |
| EPIC-TAMU     | 0.2          | 0.19 | 0.19 | 0.13 | 0.31         | 0.16 | 0.14 | 0.19 | 0.36  | 0.53 | 0.25 | 0.19 | 0.13 | 0.09 | 0.09 | 0.1  |
| GEPIC         | 0.21         | 0.17 | 0.19 | 0.15 | 0.25         | 0.15 | 0.12 | 0.18 | 0.35  | 0.27 | 0.23 | 0.21 | 0.23 | 0.18 | 0.15 | 0.17 |
| LPJ-GUESS     | 0.14         | 0.12 | 0.11 | 0.07 | 0.46         | 0.09 | 0.08 | 0.09 | -     | -    | -    | -    | -    | -    | -    | -    |
| LPJmL         | 0.18         | 0.16 | 0.17 | 0.15 | 0.24         | 0.19 | 0.16 | 0.14 | 0.4   | 0.25 | 0.22 | 0.22 | 0.16 | 0.09 | 0.09 | 0.1  |
| ORCHIDEE-crop | 0.05         | 0.05 | 0.05 | 0.05 | -            | -    | -    | -    | 0.20  | 0.20 | 0.20 | 0.20 | 0.14 | 0.10 | 0.10 | 0.10 |
| pDSSAT        | 0.35         | 0.36 | 0.35 | 0.28 | 0.51         | 0.14 | 0.12 | 0.2  | 0.46  | 0.51 | 0.49 | 0.44 | 0.39 | 0.37 | 0.34 | 0.37 |
| PEPIC         | 0.21         | 0.19 | 0.2  | 0.14 | 0.29         | 0.14 | 0.11 | 0.12 | 0.42  | 0.27 | 0.23 | 0.17 | 0.26 | 0.20 | 0.18 | 0.16 |

\* “-” denotes the lack of raw GGCM simulation

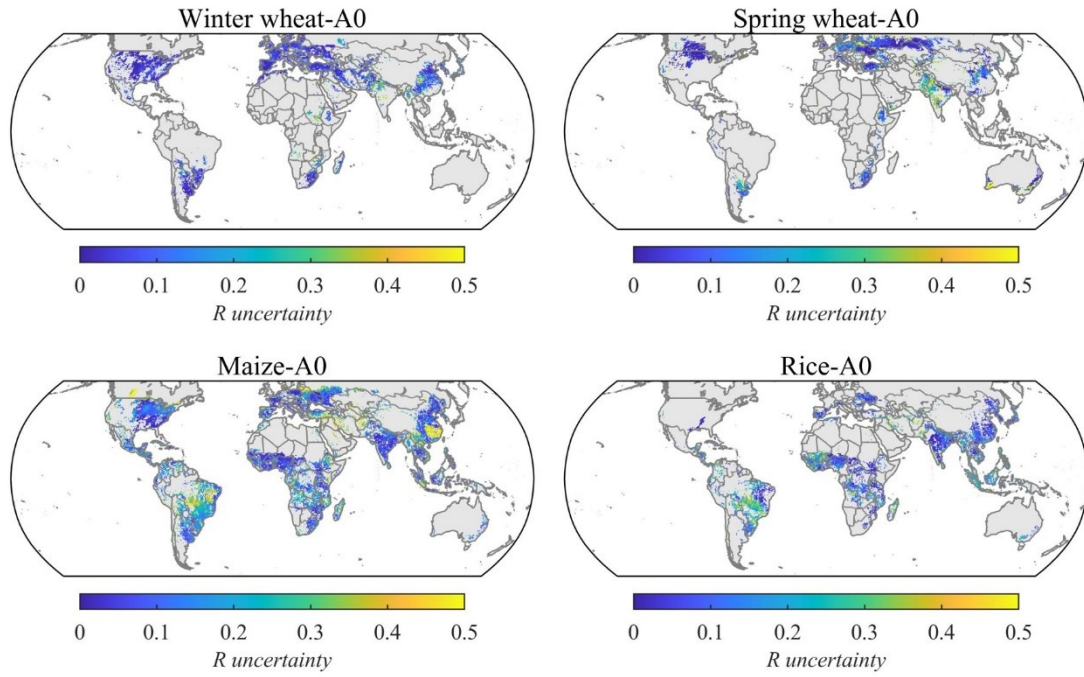

**Figure S1** Uncertainty of correlation coefficient ( $R$ ) across multi-model ensemble in the baseline over current cropland. The uncertainty was measured by the standard deviation of  $R$ s across multi-models.

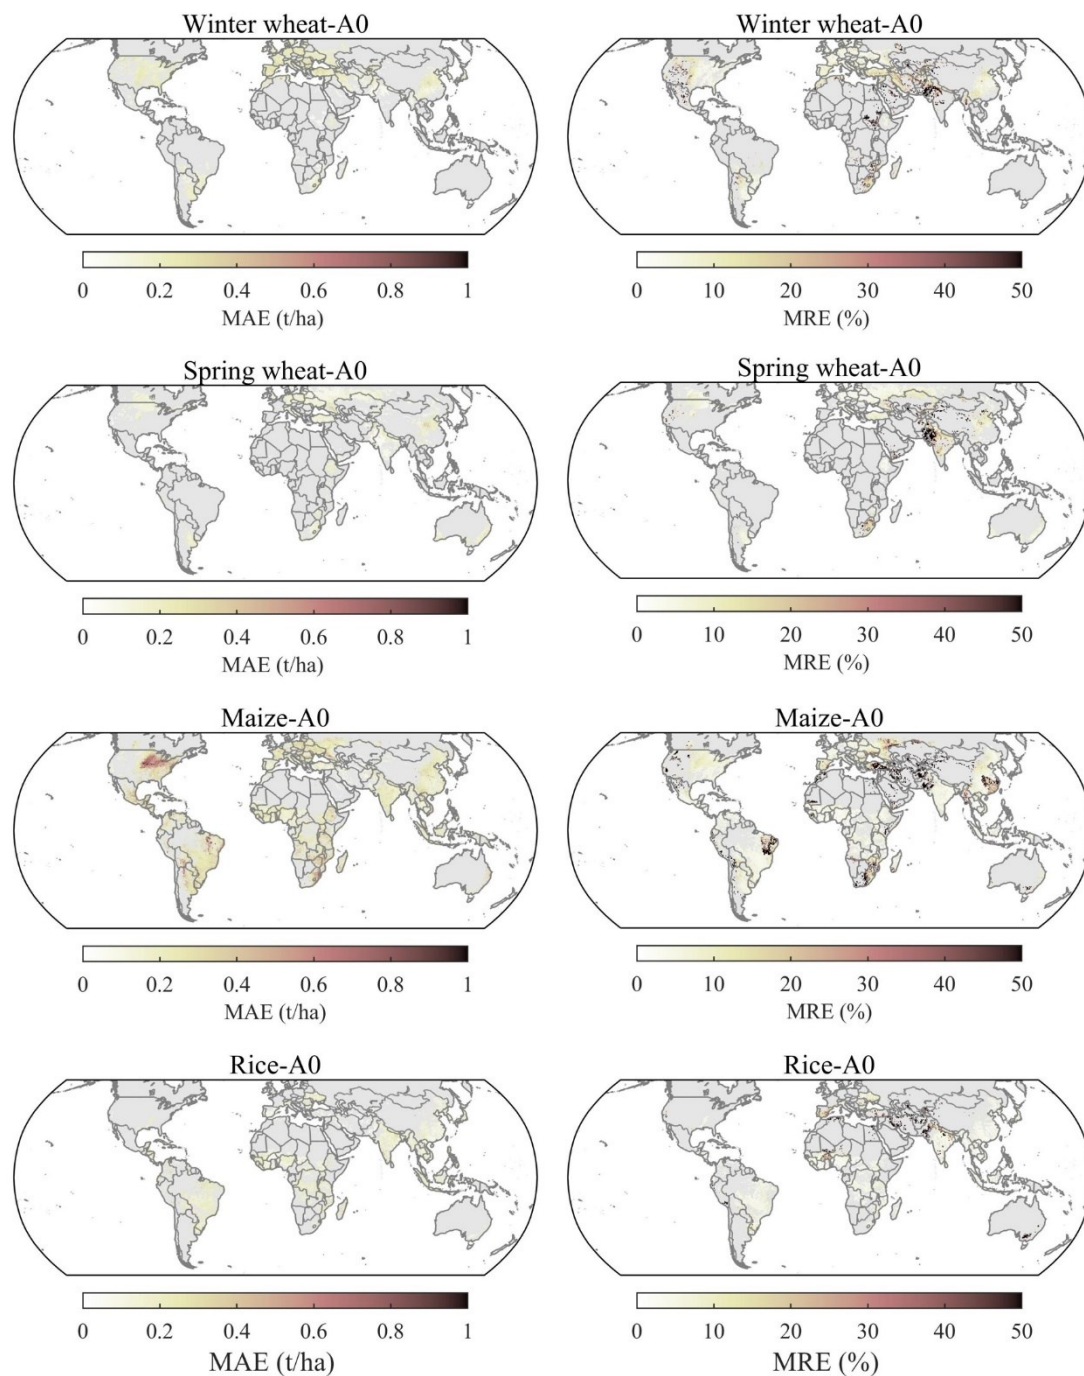

**Figure S2** Spatial distribution of MAE and MRE over current croplands in the baseline. MAE: mean absolute error. MRE: mean relative error.

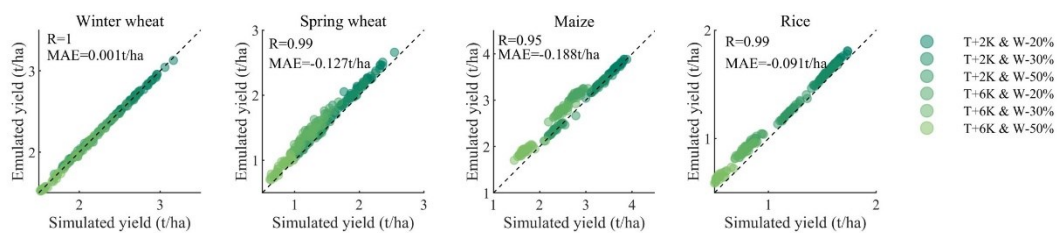

**Figure S3** Performance of emulator (LPJmL-A0) in reproducing the year to year variation of global

mean yield from 1981 to 2010 under varied T, W perturbations and T+W perturbations.

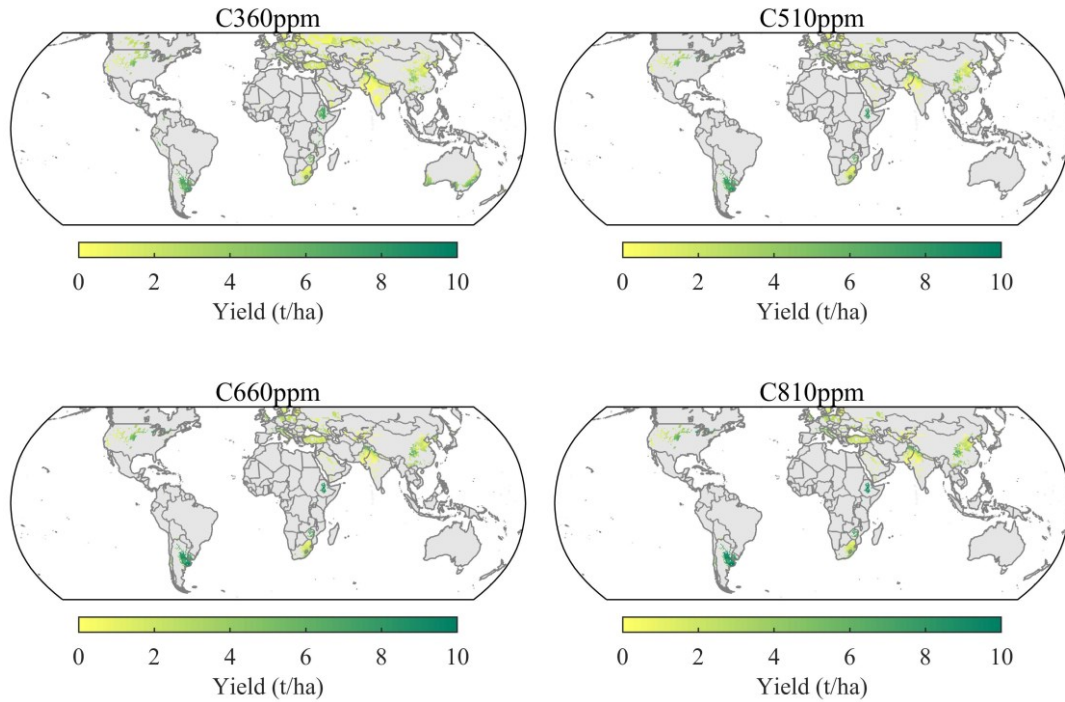

**Figure S4** The spatial distribution of simulated yield under CO<sub>2</sub> perturbations. The spatial extent has declined sharply under C510ppm, C660ppm and C810ppm relative to the C360ppm. Particularly, in Russia, Canada, India and Australia.

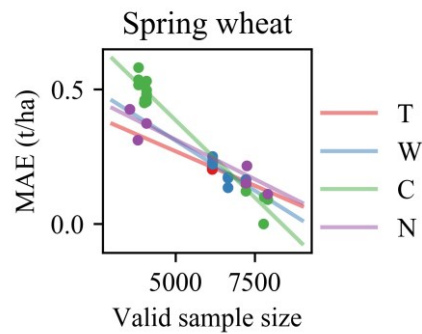

**Figure S5** Dependence of median MAE and valid sample size. Dots denote the median MAE of one emulator across all grids under each perturbation. The valid sample size denotes the number of valid gridded yield for each perturbation.
